# Supplementary material
Source: publisher figshare collection journal article supplement (https://springernature.figshare.com/ndownloader/files/8448308)

Supplementary Figure

Flow cytometry diagram

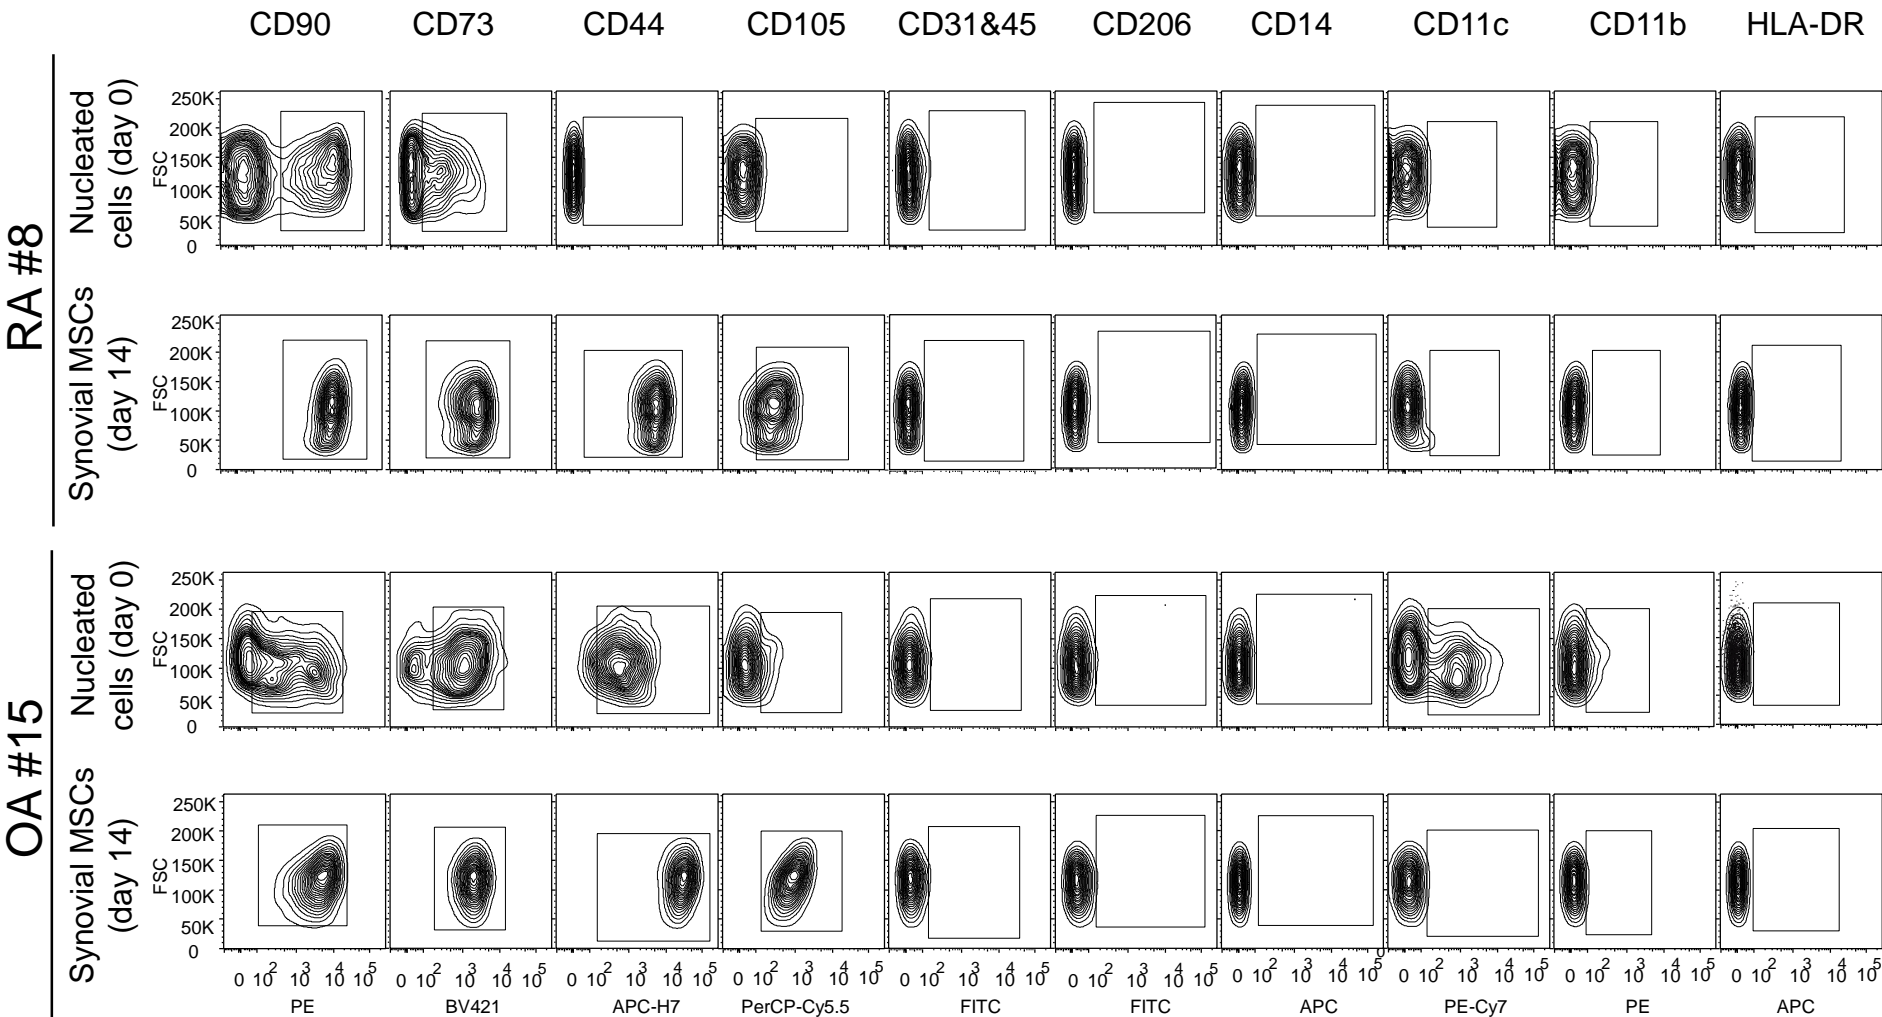

Supplement: Supplementary file 1 [file 8448308]

Supplementary Figure

Isotype control

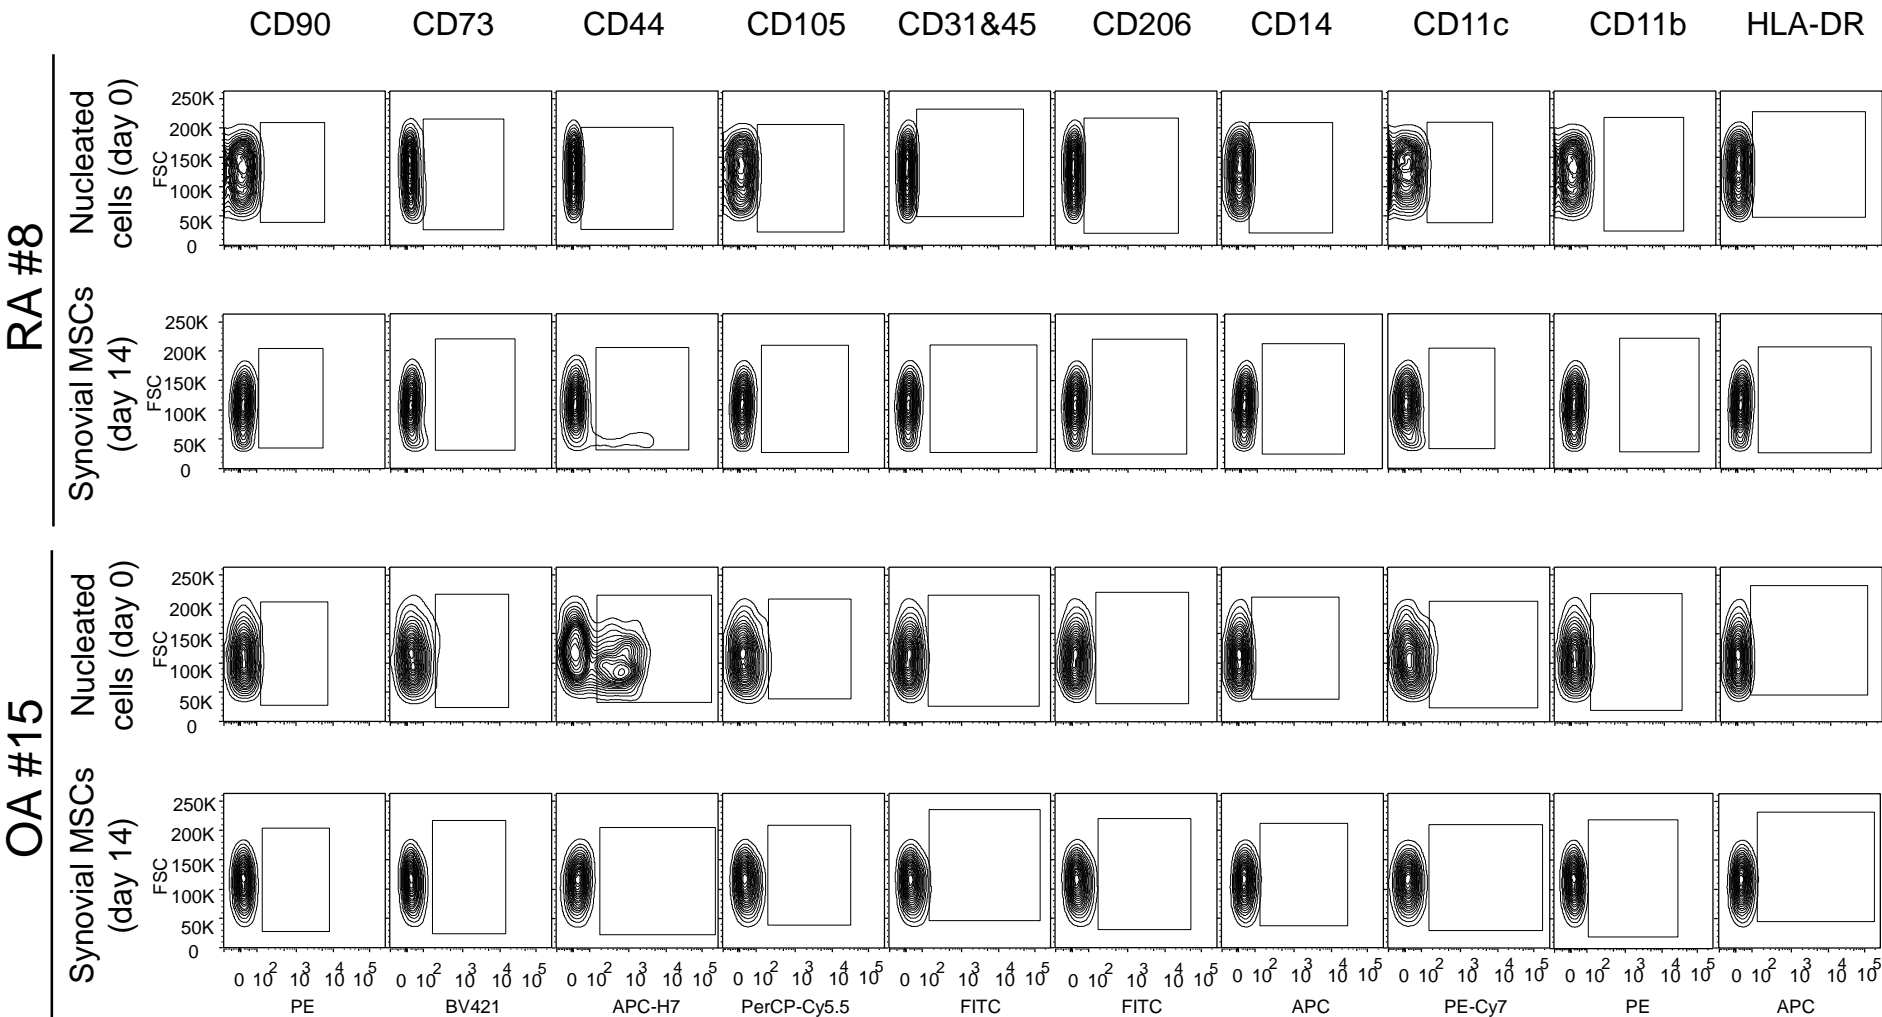

Supplement: Supplementary file 2 [file 8448308]
